# Supplementary material for: Discovery of Avian Paramyxoviruses APMV-1 and APMV-6 in Shorebirds and Waterfowl in Southern Ukraine
Source: MDPI journal article supplement (doi:10.3390/v15030699), 2023-03-08
Supplement: s1 [file s1]

## Supplementary Tables and Figures

**Supplementary Table S1.** Avian sampling. Complete list of fecal samples from wild bird species collected in both southern and northern Ukraine from December 2016 – December 2017. Sampling in the autumn (August-October) and winter (November-February) seasons were focused on collecting migrating birds, while spring season was focused on spring migration (March-May) and sampling prior to and after nesting period (June-July).

| Bird Species            |                               | Seasons |        |        | Total |
|-------------------------|-------------------------------|---------|--------|--------|-------|
| Common Name             | Scientific Name               | Winter  | Spring | Autumn |       |
| <b>ANSERIFORMES</b>     |                               |         |        |        |       |
| White-fronted Goose     | <i>Anser albifrons</i>        | 417     | 257    | 359    | 1033  |
| Red-breasted Goose      | <i>Rufibrenta ruficollis</i>  | -       | -      | 23     | 23    |
| Garganey                | <i>Anas querquedula</i>       | 25      | 18     |        | 43    |
| Mallard                 | <i>Anas platyrhynchos</i>     | 253     | 415    | 432    | 1100  |
| Shelduck                | <i>Tadorna tadorna</i>        | 208     | 82     | 139    | 429   |
| Ruddy Shelduck          | <i>Tadorna ferruginea</i>     | 35      | 25     | 43     | 103   |
| Mute Swan               | <i>Cygnus olor</i>            | 11      | 23     | 15     | 49    |
| Whooper Swan            | <i>Cygnus cygnus</i>          | 125     | -      | 145    | 270   |
| Greylag Goose           | <i>Anser anser</i>            | 32      | 340    | 14     | 386   |
| Wigeon                  | <i>Anas penelope</i>          | 5       | -      | 10     | 15    |
| Shoveler                | <i>Anas clypeata</i>          | 22      | 2      | -      | 24    |
| Teal                    | <i>Anas crecca</i>            | 10      | -      | 51     | 61    |
| Wild duck               | <i>Anas spp.</i>              | 38      | -      | -      | 38    |
| Pintail                 | <i>Anas acuta</i>             | 6       | -      | -      | 6     |
| <b>CHARADRIIFORMES</b>  |                               |         |        |        |       |
| Yellow-legged Gull      | <i>Larus cachinnans</i>       | 23      | 48     | 62     | 133   |
| Black-headed Gull       | <i>Larus ridibundus</i>       | 8       | 236    | 18     | 262   |
| Slender-billed Gull     | <i>Larus genei</i>            | 20      | 16     | -      | 36    |
| Ruff                    | <i>Phylomachus pugnax</i>     | 101     | 1      | -      | 102   |
| Mediterranean Gull      | <i>Larus melanocephalus</i>   | 20      | 169    | -      | 189   |
| Common Gull             | <i>Larus canus</i>            | 10      | -      | 8      | 18    |
| Great Black-headed Gull | <i>Larus ichthyæetus</i>      | -       | 5      | 35     | 40    |
| Dunlin                  | <i>Calidris alpina</i>        | -       | -      | 10     | 10    |
| Snipe                   | <i>Gallinago gallinago</i>    | -       | -      | 15     | 15    |
| Little Gull             | <i>Larus minutus</i>          | -       | 5      | -      | 5     |
| Little Tern             | <i>Sterna albifrons</i>       | -       | 5      | -      | 5     |
| White-winged Black Tern | <i>Chlidonias leucopterus</i> | -       | 20     | -      | 20    |
| Caspian Tern            | <i>Hydroprogne caspia</i>     | 7       | -      | -      | 7     |
| Avocet                  | <i>Recurvirostra avosetta</i> | 5       | -      | -      | 5     |
| Gulls spp.              |                               | 4       | 10     | -      | 14    |

|                                  |                                   |             |             |             |             |  |
|----------------------------------|-----------------------------------|-------------|-------------|-------------|-------------|--|
| <b>PODICIPEDIFORMES</b>          |                                   |             |             |             |             |  |
| Great Crested Grebe              | <i>Podiceps cristatus</i>         | -           | -           | 1           | 1           |  |
| <b>GRUIFORMES</b>                |                                   |             |             |             |             |  |
| Demoiselle Crane                 | <i>Anthropoides virgo</i>         | -           | 12          | -           | 12          |  |
| Crane                            | <i>Grus grus</i>                  | 16          | 17          | -           | 33          |  |
| Coot                             | <i>Fulica atra</i>                | 9           | -           | -           | 9           |  |
| <b>CICONIIFORMES</b>             |                                   |             |             |             |             |  |
| Great White Egret                | <i>Egretta alba</i>               | -           | 15          | -           | 15          |  |
| Little Egret                     | <i>Egretta garzetta</i>           | -           | 5           | -           | 5           |  |
| Grey Heron                       | <i>Ardea cinerea</i>              | -           | 29          | -           | 29          |  |
| Spoonbill                        | <i>Platalea leucorodia</i>        | -           | 7           | -           | 7           |  |
| <b>PELECANIFORMES</b>            |                                   |             |             |             |             |  |
| Dalmatian Pelican                | <i>Pelecanus crispus</i>          | -           | 13          | 2           | 15          |  |
| Cormorant                        | <i>Phalacrocorax carbo</i>        | -           | 64          | 67          | 131         |  |
| White Pelican                    | <i>Pelecanus onocrotalus</i>      | 15          | 26          | -           | 41          |  |
| Pygmy Cormorant                  | <i>Phalacrocorax pygmaeus</i>     | 5           | -           | -           | 5           |  |
| <b>FALCONIFORMES</b>             |                                   |             |             |             |             |  |
| Marsh Harrier                    | <i>Circus aeruginosus</i>         | -           | 1           | -           | 1           |  |
| <b>OTHER</b>                     |                                   |             |             |             |             |  |
| Environmental (Fresh bird feces) | <i>Species was not identified</i> | -           | 45          | -           | 45          |  |
| <b>Total</b>                     |                                   | <b>1430</b> | <b>1911</b> | <b>1449</b> | <b>4790</b> |  |

**Supplementary Table S2.** Overview of the infection rate of APMV-1 in wild birds by RT-PCR.

| Species             | Infection Rate (%) |
|---------------------|--------------------|
| Whooper Swan        | 0.37               |
| Mallard             | 0.36               |
| Mediterranean Gull  | 0.52               |
| Shelduck            | 0.46               |
| White-fronted Goose | 0.09               |
| White pelican       | 2.43               |
| Snipe               | 0.07               |

**Supplementary Table S3.** The isolation rate of APMV (avulavirus) in wild birds by virus isolation *in ovo*.

| Species        | Isolation Rate (%)<br>APMV |
|----------------|----------------------------|
| Greylag Goose  | 0.26                       |
| Mallard        | 0.54                       |
| Shelduck       | 0.46                       |
| Ruddy shelduck | 1.94                       |

**Supplementary Table S4.** Overview of samples tested by HI assay from wild birds in 2017. AIV, avian influenza virus with provisional HA serological subtype noted, APMV avian paramyxovirus (avulavirus) with provisional type noted; Unidentified, samples that were HI positive (hemagglutinating) but not identifiable by serological panel available.

| No. | Strain Name                                    | Serological Identification |
|-----|------------------------------------------------|----------------------------|
| 1   | Shelduck/Baz Odesa/13-16-28-10/17              | AIV H2/H5/H7               |
| 2   | Mallard/Er Odesa/41-50-8-08/17                 | AIV H3                     |
| 3   | Mallard/Dr3 Kherson /1-5/6-08/17               | AIV H3                     |
| 4   | Ruddy shelduck/Pop Kherson/1-5-23-01/17        | AIV H3                     |
| 5   | Ruddy shelduck/Pop Kherson/6-10-23-01/17       | AIV H3                     |
| 6   | Ruddy shelduck/Pop Kherson/11-15-23-01/17      | AIV H3                     |
| 7   | Shelduck/Zh. Yar Odesa/1-5-27-10/17            | AIV H3/H7                  |
| 8   | Environmental/ND Kherson/31-35-7-08/17         | AIV H4                     |
| 9   | Mallard/Ol2 Kherson/33-36/5-09/17              | AIV H4                     |
| 10  | Mallard/Dr3 Kherson /6-10-6-08/17              | AIV H4                     |
| 11  | Mallard/Zh. Yar Odesa/1-5/10-08/17             | AIV H4                     |
| 12  | Mallard/Syv Kherson/1-4/4-09/17                | AIV H5                     |
| 13  | Mallard/Chon Kherson/13-16/3-09/17             | AIV H5                     |
| 14  | Mallard/Hor Kherson/16-20/29-11/17             | AIV H7/H9                  |
| 15  | Shelduck/Pop Kherson/21-25/23-01/17            | AIV H10                    |
| 16  | Whooper Swan/Des Odesa/1-5/30-01/17            | AIV H11                    |
| 17  | Whooper Swan/Des Odesa /6-10/30-01/17          | AIV H11                    |
| 18  | Black-headed Gull / Dr3 Kherson /1-3/6-08/17   | AIV H11/H13                |
| 19  | Greylag Goose /Myt Kherson/1-4/4-09/17         | APMV-1                     |
| 20  | Mallard/Myt Kherson/1-4/4-09/17                | APMV-1                     |
| 21  | Shelduck/Ser Kherson/11-15/6-08/17             | APMV-1                     |
| 22  | Mallard/Kat Odesa/1-5/1-12/17                  | APMV-1                     |
| 23  | Mallard/Kat Odesa/6-10/1-12/17                 | APMV-1                     |
| 24  | Shelduck/Chur Kherson/1-5/2-11/17              | APMV-1                     |
| 25  | Ruddy shelduck/Hr Kherson/11-15/27-01/17       | APMV-1/APMV-7              |
| 26  | Mallard/Hor Kherson/56-60/29-11/17             | APMV-4                     |
| 27  | Mallard/Druzh Kherson/1-3/5-09/17              | APMV-4                     |
| 28  | Environmental/ND Kherson /41-45/7-08/17        | APMV-6                     |
| 29  | Mallard/ND Kherson /11-15/4-09/17              | APMV-6                     |
| 30  | Mallard/Chon Kherson/41-45/1-11/17             | AIV H1                     |
| 31  | Ruddy shelduck/ ND Kherson /1-5/5-08/17        | Unidentified               |
| 32  | Mallard/Prym T Odesa/35-39/26-09/17            | Unidentified               |
| 33  | White fronted goose/Vas Kherson/2,4,5/29-11/17 | Unidentified               |
| 34  | Environmental/ND Kherson /26-30/7-08/17        | Unidentified               |
| 35  | Shelduck/Ser Kherson/16-20/6-08/17             | Unidentified               |
| 36  | Mallard/Dr2 Kherson /16-20/6-08/17             | Unidentified               |
| 37  | Mallard/Ras Odesa/36-40/11-08/17               | Unidentified               |
| 38  | Mallard/Ras Odesa/16-20/11-08/17               | Unidentified               |
| 39  | Mallard/PK Kherson/1-5/7-08/17                 | Unidentified               |
| 40  | Mallard/Vas Kherson/1-5/24-01/17               | Unidentified               |

**Supplementary Table S7.** Overview of 2017 APMV-1 and APMV-6 positive samples sequenced using MinION. APMV was amplified using a RT PCR with four pools of tiling primers. Amplicons were sequenced with an LSK109 nanopore sequencing kit. Sequences were aligned to a reference database to identify a closest match for further analysis with Minimap2. Consensus sequences were generated using Medaka. Sequences were realigned to the reference and the percent identity was calculated with Geneious.

| Sample Identifier                               | Species    | Sample Location | Total # of Reads Sequenced | Closest Reference                     | Percent Identity | Consensus Sequence Length |
|-------------------------------------------------|------------|-----------------|----------------------------|---------------------------------------|------------------|---------------------------|
| APMV1 Mallard Myt_Kherson 1-4-4-09 2017         | Mallard    | Myt Kherson     | 92,095                     | KX352836 APMV1 Teal Russia 2010_08_28 | 98.4%            | 14,089                    |
| APMV1 Mallard AN_Kherson TM434778 2002          | Mallard    | Kherson         | 653,240                    | KX352836 APMV1 Teal Russia 2010_08_28 | 98.7%            | 15,168                    |
| APMV-6 Environmental ND Kherson 41-45 7-08 2017 | Env.       | Kherson         | 429,606                    | JX522537.1 APMV6 Mallard China 2011   | 98.6%            | 16,234                    |
| APMV-6 Mallard ND Kherson 11-15 4-09 2017       | Mallard    | Kherson         | 764,971                    | JN571486 APM6 Duck Belgium 2007       | 96.6%            | 16,235                    |
| APMV-1 Mallard Dr_Kherson 1-3 5-09 2017         | Mallard    | Druzh Kherson   | 121,493                    | KU601398 APMV1 Auk Russia 2015        | 98.7%            | 15,085                    |
| APMV-1 Grey_Goose Myt 1-4 4-09 2017             | Grey goose | Myt Kherson     | 925,542                    | KU601398 APMV1 Auk Russia 2015        | 99.1%            | 15,093                    |
| APMV-1 Shelduck Chur_Kherson 1-5 2-11 2017      | Shelduck   | Chur Kherson    | 1,276,200                  | KU601398 APMV1 Auk Russia 2015        | 99.2%            | 15,090                    |

**Supplementary Table S8.** Amino acid substitution table for APMV1/Mallard/Myt Kherson/1-4/4-09/17 compared to reference KX352836|APMV1|Teal|Russia|2010\_08\_28.

| Nucleoprotein | Phosphoprotein | Matrix Protein | Fusion Protein | Hemagglutinin Protein | Large Polymerase Protein |
|---------------|----------------|----------------|----------------|-----------------------|--------------------------|
| Y230H         | T210I          | K226R          | None           | L211P                 | S3G                      |
|               | S239N          | G230R          |                | RR 293G               | V187I                    |
|               | I248V          |                |                | E495V                 | V207E                    |
|               | A341V          |                |                | C596Y                 | I661V                    |
|               | M342I          |                |                | K603E                 | S894F                    |
|               |                |                |                |                       | S952N                    |
|               |                |                |                |                       | R1071K                   |
|               |                |                |                |                       | N1564H                   |
|               |                |                |                |                       | S1753N                   |
|               |                |                |                |                       | weird                    |
|               |                |                |                |                       | weird                    |
|               |                |                |                |                       | weird                    |
|               |                |                |                |                       | T2095I                   |
|               |                |                |                |                       | L2139P                   |
|               |                |                |                |                       | weird                    |
|               |                |                |                |                       | weird                    |
|               |                |                |                |                       | D2053N                   |
|               |                |                |                |                       | weird                    |

**Supplementary Table S9.** Amino acid substitution table for APMV-1/Mallard/AN Kherson/TM434778/2002 compared to reference KX352836|APMV1|Teal|Russia|2010\_08\_28.

| Nucleoprotein | Phosphoprotein | Matrix Protein | Fusion Protein | Hemagglutinin Protein | Large Polymerase Protein |
|---------------|----------------|----------------|----------------|-----------------------|--------------------------|
| None          | A78V           | None           | T203A          | R63K                  | S3G                      |
|               |                |                |                | C123S                 | S156C                    |
|               |                |                |                | D285E                 | V187I                    |
|               |                |                |                | R293G                 | O626P                    |
|               |                |                |                | K567R                 | S894F                    |
|               |                |                |                | I590V                 | E1031G                   |
|               |                |                |                | K603E                 | P1734S                   |
|               |                |                |                |                       | Y2202C                   |

**Supplementary Table S10.** Amino acid substitution table for APMV-6/Environmental/ND Kherson/41-45/7-08/17 compared to reference JX522537.1|APMV6|Mallard|China|2011.

| Nucleoprotein | Hemagglutinin Protein | Phosphoprotein | Matrix Protein | Fusion Protein | Large Polymerase Protein | SH Protein |
|---------------|-----------------------|----------------|----------------|----------------|--------------------------|------------|
| A79T          | K57R                  | S64P           | V342I          | N20S           | T51A                     | T49A       |
| D419N         | P64S                  | S68P           |                | A76T           | I121V                    | N89T       |
|               | S71G                  | N83D           |                | S77G           | A405T                    |            |
|               | V171A                 | H168Y          |                | E148D          | S637N                    |            |
|               | V212I                 |                |                |                | P650L/M                  |            |
|               | R356G                 |                |                |                | H725N                    |            |
|               | C438T                 |                |                |                | P939L                    |            |
|               | I446L/M               |                |                |                | Q1097H                   |            |
|               | A481V                 |                |                |                | N1269K                   |            |
|               | F560S                 |                |                |                | Y1599C                   |            |
|               | T604A                 |                |                |                | V2031A                   |            |
|               |                       |                |                |                | Q2099H                   |            |
|               |                       |                |                |                | L2229F                   |            |

**Supplementary Table S11.** Amino acid substitution table for APMV-6/Mallard/ND Kherson/11-15/4-09/17 compared to reference JN571486|APM6|Duck|Belgium|2007.

| Nucleoprotein | Hemagglutinin Protein | Phosphoprotein | Matrix Protein | Fusion Protein | Large Polymerase Protein | SH Protein |
|---------------|-----------------------|----------------|----------------|----------------|--------------------------|------------|
| G50S          | V34I                  | T60I           | I48V           | L8P            | R131Q                    | V20G       |
|               | I63V                  | S78I           |                | R26G           | N176S                    | I38V       |
|               | E106K                 | G82E           |                | E98D           | R207K                    | G39R       |
|               | N153S                 | S84L           |                |                | E294G                    | N90D       |
|               | V205A                 | P94L           |                |                | E322D                    |            |
|               | V226M                 | P108L/M        |                |                | I456V                    |            |
|               | D293N                 | T117X          |                |                | K502R                    |            |
|               | Q315H                 | N118H          |                |                | L631F                    |            |
|               | L339F                 | T150A          |                |                | T643K                    |            |
|               | K414R                 | A166T          |                |                | P644S                    |            |
|               | G596M                 | T175A          |                |                | T648A                    |            |
|               | Y603H                 | D196E          |                |                | D726N                    |            |
|               |                       | E206D          |                |                | P937L                    |            |
|               |                       | F246L          |                |                | L1059Q                   |            |
|               |                       | A348T          |                |                | S1400I                   |            |
|               |                       | I379T          |                |                | N1814H                   |            |
|               |                       | T380M          |                |                | P2080S                   |            |
|               |                       | N415S          |                |                |                          |            |

**Supplementary Table S12.** Amino acid substitution table for APMV-1/mallard/Dr Kherson/1-3/5-09/17 2017 compared to reference KU601398|APMV1|Auk|Russia|2015.

| Nucleoprotein | Hemagglutinin Protein | Phosphoprotein | Matrix Protein | Fusion Protein | Large Polymerase Protein |
|---------------|-----------------------|----------------|----------------|----------------|--------------------------|
| Y489H         | L211P                 | V78A           | S48L           | I335T          | K263R                    |
|               | I270M                 | S239N          | K256R          |                | I417V                    |
|               | E495V                 | I248V          | G230R          |                | O626P                    |
|               | C596Y                 | A341V          |                |                | I661V                    |
|               | A598T                 | M342I          |                |                | S952N                    |
|               |                       |                |                |                | V1365M                   |
|               |                       |                |                |                | N1564H                   |



**Supplementary Table S13.** Amino acid substitution table for APMV-1/Grey goose/Myt/1-4/4-09/17 compared to reference KU601398|APMV1|Auk|Russia|2015.

| Nucleoprotein | Hemagglutinin Protein | Phosphoprotein | Matrix Protein | Fusion Protein | Large Polymerase Protein |
|---------------|-----------------------|----------------|----------------|----------------|--------------------------|
| Y489H         | I270M                 | V78A           | K226R          | I335T          | K263R                    |
|               | E495K                 | T210I          | G230R          |                | I417V                    |
|               | C596Y                 | S239N          |                |                | O626P                    |
|               | A598T                 | A341V          |                |                | I661V                    |
|               |                       | M342I          |                |                | S952N                    |
|               |                       |                |                |                | V1365M                   |

**Supplementary Table S14.** Amino acid substitution table for APMV-1/shelduck/Chur/1-5/2-11/17 compared to reference KU601398|APMV1|Auk|Russia|2015.

| Nucleoprotein | Hemagglutinin Protein | Phosphoprotein | Matrix Protein | Fusion Protein | Large Polymerase Protein |
|---------------|-----------------------|----------------|----------------|----------------|--------------------------|
| N463S         | I270M                 | none           | T74I           | V19A           | T253M                    |
|               | A598T                 |                |                | I335T          | I417V                    |
|               |                       |                |                |                | K1071R                   |
|               |                       |                |                |                | V1365M                   |
|               |                       |                |                |                | M2056T                   |

| Sample ID                               | Nucleoprotein            | Phosphoprotein | Matrix protein | Fusion protein | Hemagglutinin-Neuraminidase protein | Large polymerase protein |
|-----------------------------------------|--------------------------|----------------|----------------|----------------|-------------------------------------|--------------------------|
| APMV1/Mellard/Myt Kherson/1-4-4-09/2017 | Not enough sequence data | 991 – 2178     | 2394 – 3488    | 3648 – 5309    | 5516 - 7366                         | Not enough sequence data |
| APMV1/Mellard/AN Kherson/TM434778/2002  | 109 - 1578               | 1874 - 3061    | 3277 – 4371    | 4532 - 6193    | 6400 - 8250                         | 8369 - 14983             |
| APMV1/Mellard/Dr Kherson/1-3-5-09/2017  | 100 - 1569               | 1873 - 3060    | 3276 - 4370    | 4531 - 6192    | 6399 - 8249                         | 8268 - 14983             |
| APMV1/Grey Goose/Myt/1-4-4-09/2017      | 115 - 1584               | 1879 - 3066    | 3282 - 4376    | 4536 - 6197    | 6404 - 8254                         | 8373 – 14987             |
| APMV1/Shelduck/Chur/1-5-2-11/2017       | 113 - 1582               | 1878 - 3065    | 3281 - 4375    | 4535 - 6196    | 6403 - 8253                         | 8372 - 14985             |

**Supplementary Figure S1.** Genome assembly of APMV-1 sequences isolated in this study. Reads were aligned to APMV-1 specific reference database to identify a closest reference using Minimap2 and a consensus sequence was generated using Medaka. Consensus sequence was re-aligned to the reference to generate genome annotations using Geneious v.11.0.3.

| Sample ID                                              | Nucleoprotein | Phosphoprotein | Matrix protein | Fusion protein | Small Hydrophobic Protein | Hemagglutinin – Neuraminidase Protein | Large polymerase protein |
|--------------------------------------------------------|---------------|----------------|----------------|----------------|---------------------------|---------------------------------------|--------------------------|
| APMV6/Environment<br>al/ND Kherson/41-<br>45-7-08/2017 | 130 - 1408    | 1685 - 2977    | 3233 - 4333    | 4596 - 6263    | 6539 - 6965               | 7117 - 8958                           | 9273 - 15998             |
| APMV6/Mallard/ND<br>Kherson/11-15-4-<br>09/2017        | 128 - 1525    | 1687 - 2978    | 3234 - 4334    | 4597 - 6264    | 6541 - 6969               | 7121 - 8962                           | 9277 - 16002             |

**Supplementary Figure S2.** Genome assembly of APMV-6 sequences isolated from this study. Reads were aligned to APMV-6 specific reference database to identify a closest reference using Minimap2 and a consensus sequence was generated using Medaka. Consensus sequence was re-aligned to the reference to generate genome annotations using Geneious v11.0.3.
